# Supplementary material for: ZFP423 controls EBF2 coactivator recruitment and PPARγ occupancy to determine the thermogenic plasticity of adipocytes
Source: PubMed Central journal article supplement — Genes Dev. 2021 Nov 1;35(21-22):1461–74. doi: 10.1101/gad.348780.121 (PMC8559675; doi:10.1101/gad.348780.121), 2021-11-01
Supplement: supp_gad.348780.121_Supplemental_Fig_S3.pdf [file supp_gad.348780.121_Supplemental_Fig_S3.pdf]

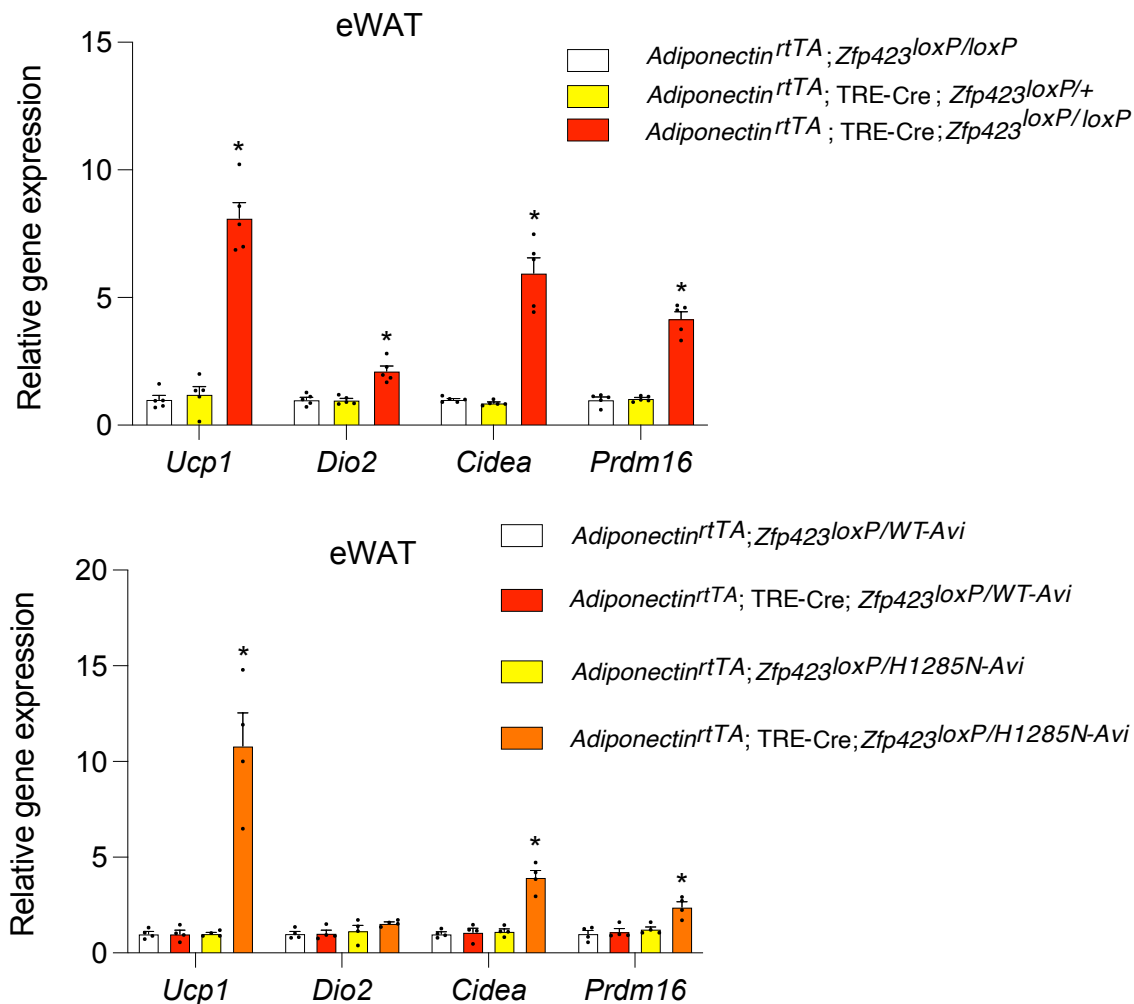

**Fig. S3. Activation of thermogenic gene expression in epididymal WAT of Adipo-*Zfp423*<sup>H1285-Avi</sup> mice.**

mRNA levels of indicated thermogenic genes in epididymal WAT (eWAT) of mice with the indicated genotypes. Gene expression was assessed four weeks after the onset of doxycycline treatment at room temperature. \* denotes statistical significance vs. Control animals ( $p < 0.05$  by two-way ANOVA). Bars represent mean + SEM. For top panel,  $n = 5$  mice for each genotype. For bottom panel,  $n = 4$  mice for each genotype.
