# Supplementary material for: ZFP423 controls EBF2 coactivator recruitment and PPARγ occupancy to determine the thermogenic plasticity of adipocytes
Source: PubMed Central journal article supplement — Genes Dev. 2021 Nov 1;35(21-22):1461–74. doi: 10.1101/gad.348780.121 (PMC8559675; doi:10.1101/gad.348780.121), 2021-11-01
Supplement: supp_gad.348780.121_Supplemental_Table_S3.pdf [file supp_gad.348780.121_Supplemental_Table_S3.pdf]

**Table S3. Enriched motifs present within ZFP423<sup>H1285N</sup>-occupied peaks.**

| Motif                                                                               | p-value of the enriched motif | Top matched known motifs                                                                                                                                                                                                                                                                                                                                                                                                                        |
|-------------------------------------------------------------------------------------|-------------------------------|-------------------------------------------------------------------------------------------------------------------------------------------------------------------------------------------------------------------------------------------------------------------------------------------------------------------------------------------------------------------------------------------------------------------------------------------------|
| 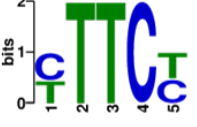   | 4.6e-53                       | <br><br><br><br>           |
|    | 6.5e-26                       | <br><br><br>                                                                                             |
|  | 2.8e-19                       | <br><br><br><br> |
