# Supplementary material for: ZFP423 controls EBF2 coactivator recruitment and PPARγ occupancy to determine the thermogenic plasticity of adipocytes
Source: PubMed Central journal article supplement — Genes Dev. 2021 Nov 1;35(21-22):1461–74. doi: 10.1101/gad.348780.121 (PMC8559675; doi:10.1101/gad.348780.121), 2021-11-01
Supplement: supp_gad.348780.121_Supplemental_Table_S4.pdf [file supp_gad.348780.121_Supplemental_Table_S4.pdf]

**Table S4. GO biological process analysis of ZFP423<sup>H1285N</sup>-occupied genes.**

| GO biological process                                    | -log <sub>10</sub> (Binomial p value) |
|----------------------------------------------------------|---------------------------------------|
| protein heterotrimerization                              | 10.31                                 |
| regulation of actin filament depolymerization            | 6.21                                  |
| collagen fibril organization                             | 5.97                                  |
| multicellular organismal macromolecule metabolic process | 5.15                                  |
| multicellular organismal metabolic process               | 4.71                                  |
| protein folding                                          | 4.47                                  |
| extracellular matrix organization                        | 4.30                                  |
| extracellular structure organization                     | 4.28                                  |
| cellular response to amino acid stimulus                 | 4.11                                  |
| cellular response to acid                                | 4.04                                  |
| phagocytosis                                             | 3.75                                  |
| maintenance of location in cell                          | 3.58                                  |
| cell-matrix adhesion                                     | 3.58                                  |
| cell-substrate adhesion                                  | 3.53                                  |
| regulation of translation                                | 2.78                                  |
| posttranscriptional regulation of gene expression        | 2.51                                  |
| rna splicing                                             | 2.44                                  |
| mrna processing                                          | 2.16                                  |
| mrna metabolic process                                   | 2.11                                  |
| endocytosis                                              | 2.07                                  |
